# Supplementary material for: HOCl and Cl 2 observations in marine air
Source: Copernicus journal article supplement (doi:10.5194/acp-11-7617-2011), 2011-08-01
Supplement: Supplementary file 1 [file acp-11-7617-2011-supplement.pdf]

Supplemental Material

S1. Time series of HOCl and Cl<sub>2</sub> calibrations

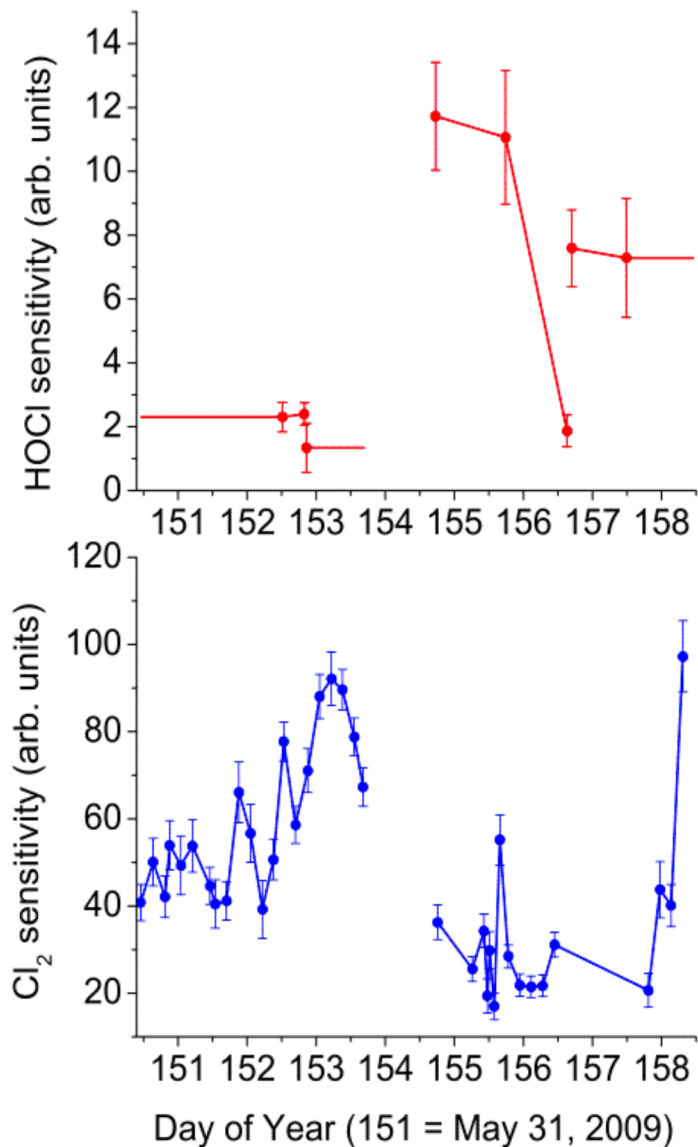

Figure S1. Instrumental sensitivity to HOCl and Cl<sub>2</sub> during the 2009 measurements. Error bars show one standard error. Solid lines show the sensitivity applied to the data to assess mixing ratios. The steep decrease in HOCl sensitivity around day 156.5 was due to a pressure drop resulting from an inlet clog. The cause of the sharp increase in Cl<sub>2</sub> sensitivity at the end of the measurements is unknown.
